# Supplementary material for: Preventing and treating PTSD-like memory by trauma contextualization
Source: PubMed Central journal article supplement (PMC7445258; doi:10.1038/s41467-020-18002-w), 2020-08-24
Supplement: 41467_2020_18002_MOESM1_ESM.pdf [file 41467_2020_18002_MOESM1_ESM.pdf]

**Preventing and treating PTSD-like memory by trauma  
contextualization**

**Al Abed *et al.***

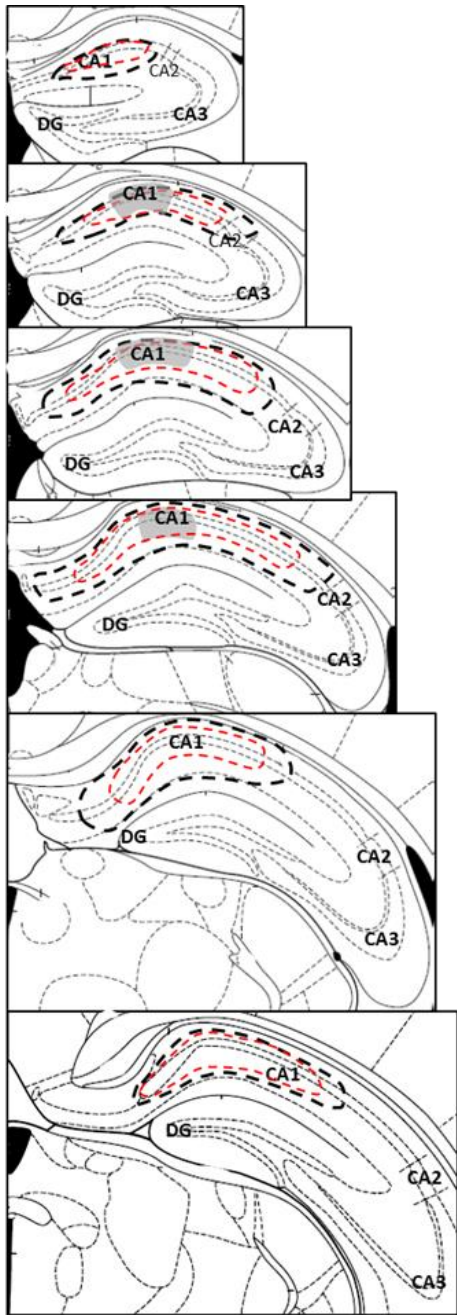

**Supplementary Figure 1| Histology:** Maximum and minimum areas of virus diffusion (black and red dashed lines, respectively) from the anterior dorsal CA1 (Bregma  $-1.34$  mm) to the posterior dorsal CA1 (Bregma  $-2.7$ ). The grey area represents the correct zone for optic fiber implantation. Infection or

implantation outside these marks was considered incorrect and mice were excluded from the study (From Franklin & Paxinos, 2001).

**Reference:**

-Franklin, K., Paxinos, G. Mouse brain in stereotaxic coordinates (Academic P. ed, Academic Press. San Diego, 2001).
